# Supplementary material for: Seasonal dynamics alter taxonomical and functional microbial profiles in Pampa biome soils under natural grasslands
Source: PeerJ. 2018 Jun 13;6:e4991. doi: 10.7717/peerj.4991 (PMC6004115; doi:10.7717/peerj.4991)
Supplement: Data S1 [file peerj-06-4991-s003.xlsx]

## Sheet: Plan4
Figure 1 - Raw data
	Month-Year	Temperature (℃)		Rainfall (mm)
		SM	SG	SM	SG
	2014-04-01	20.35	20.9	147.1	80
	2014-05-01	16.5	15.85	71.6	129
	2014-06-01	14.55	13.75	81.6	98
	2014-07-01	14.45	13.2	113.5	103.2
	2014-08-01	13.95	18.25	163.4	85.4
	2014-09-01	17.95	18.75	65.8	171
	2014-10-01	20.25	22.2	108.7	175.4
	2014-11-01	23.15	24	294	124.2
	2014-12-01	25.95	24.86	92.8	165
	2015-01-01	24.3	27.6	142	163.8
	2015-02-01	24.95	26.2	132.5	194.4
	2015-03-01	21.25	22.8	188.6	255
